# Supplementary material for: Fabrication of a symmetric supercapacitor device using MnO2/cellulose nanocrystals/graphite electrodes via sputtering for energy storage
Source: Royal Society of Chemistry journal article supplement (doi:10.1039/d4nr03476g), 2024-11-25
Supplement: d4nr03476g1.pdf [file d4nr03476g1.pdf]

## Supporting Information

### **Fabrication of Symmetric Supercapacitor Device using MnO<sub>2</sub>/Cellulose nanocrystals/Graphite electrode by Sputtering for Energy Storage**

Nitesh Choudhary,<sup>a,b</sup> Akshay Tomar,<sup>b</sup> Shiva Singh,<sup>a</sup> Ramesh Chandra,<sup>b</sup> Pradip K. Maji<sup>\*a</sup>

<sup>a</sup> *Department of Polymer and Process Engineering, Indian Institute of Technology Roorkee, Saharanpur Campus, Saharanpur- 247001, India*

<sup>b</sup> *Institute Instrumentation Centre, Indian Institute of Technology Roorkee, Roorkee-247667, India*

*\*Corresponding author: Pradip K. Maji*

*Email: [pradip@pe.iitr.ac.in](mailto:pradip@pe.iitr.ac.in); Contact No.: +91-7895965010*

## Supporting Information

### Contents:

| Supplementary Section                                                                                                                                                                                                                                                                           | Page No. |
|-------------------------------------------------------------------------------------------------------------------------------------------------------------------------------------------------------------------------------------------------------------------------------------------------|----------|
| <b>Table S1</b> The sputtering parameters used for the deposition of highly ordered MnO <sub>2</sub> thin films.                                                                                                                                                                                | 3        |
| <b>Fig. S1</b> Cross-sectional view of MnO <sub>2</sub> thin film (a-b) at 30 minutes (c-d) at 60 minutes, and (e-f) at 90 minutes.                                                                                                                                                             | 4        |
| <b>Table S2</b> shows the Roughness, Skewness ( $R_{sk}$ ), and Kurtosis values ( $R_{ku}$ ) of the prepared electrode materials.                                                                                                                                                               | 5        |
| <b>Fig. S2</b> shows the CV of cellulose nanocrystals (CNCs) on the silicon substrate at different scan rate which ranges from 0.5 to 0.005 V/s.                                                                                                                                                | 6        |
| <b>Table S3</b> Calculated areal capacitance at various scan rates with energy density and integrated area from the CV curve of the CNCs/Silicon electrode.                                                                                                                                     | 6        |
| <b>Table S4</b> Calculated areal capacitance at various scan rates with energy density and integrated area from the CV curve of the CNCs/Graphite electrode.                                                                                                                                    | 7        |
| <b>Fig. S3</b> shows (a-g) the CV of pristine graphite (h-l) CV of CNCs/Graphite at different scan rates spanning from 0.5 to 0.005 V/s.                                                                                                                                                        | 8        |
| <b>Table S5</b> Calculated areal capacitance at various scan rates with energy density and integrated area from the CV curve of the MnO <sub>2</sub> on CNCs/Graphite (20:20, 1h, 70W, 7.9mTorr, 75 <sup>o</sup> C) electrode.                                                                  | 8        |
| <b>Fig. S4</b> Cyclic voltammetry curves of MnO <sub>2</sub> /CNCs/Graphite-75 <sup>o</sup> C at various scan rates.                                                                                                                                                                            | 9        |
| <b>Fig. S5</b> Cyclic voltammetry of MnO <sub>2</sub> /CNC/Graphite@150 <sup>o</sup> C and @250 <sup>o</sup> C at various scan rates.                                                                                                                                                           | 10       |
| <b>Fig. S6</b> shows the comparative graph (a) the CV of CNCs, CNCS/Graphite, (b)the CV of CNCs, CNCS/Graphite, and Graphite, (c) shows CV of only CNCs, (d) CV curve of CNCs and composite, (e) Combine CV curve, and (f) the CV of MnO <sub>2</sub> /CNCs/Graphite at different temperatures. | 11       |
| <b>Fig. S7</b> Thermal analysis of CNCs, Graphite, and MnO <sub>2</sub> /CNCs/Graphite                                                                                                                                                                                                          | 12       |
| <b>Fig. S8</b> (a) Before cycling FESEM image, (b) Cross-section image before cycling, (c) After Cycling FESEM image, and (d)EDX image after cycling of symmetric supercapacitor device.                                                                                                        | 13       |
| <b>Table S6</b> Comparison of electrode materials used, areal specific capacitance, energy density, power density, scan rate or current densities with cyclic efficiency after several cycles with the present study and other reported materials.                                              | 14       |

## Supporting Information

References

15

**Table S1** The sputtering parameters used for the deposition of highly ordered MnO<sub>2</sub> thin films.

| Sputtering parameters     |                                                 |
|---------------------------|-------------------------------------------------|
| Target Material           | Manganese (Mn)                                  |
| Substrate                 | n-silicon (100)/Graphite sheet                  |
| Base pressure             | 3 $\mu$ Torr                                    |
| Working pressure          | ~8 mTorr                                        |
| Deposition power          | 70W (RF)                                        |
| Deposition time           | 60 minutes                                      |
| Substrate temperature     | Room temperature (RT) and Temperature variation |
| Target-substrate distance | 5.5 cm                                          |
| Gas used                  | Ar:O <sub>2</sub> ::20:20 (sccm)                |

### Supplementary Section S1: Characterization details: Calculation of electrochemical parameters

#### S1.1 Electrodes in three-electrode configuration.

The areal capacitance of the electrode,

$$C_a = \frac{2 \times I \times dt}{V \times A} \quad (S1)$$

Where  $C_a$  is the areal capacitance,  $td$  is the discharge time,  $I$  is the current density,  $V$  is the voltage window and  $A$  is the area of the electrode.

The energy density ( $E$ ) and power density ( $P$ ) were calculated using equation (S2 and S3) <sup>1</sup>.

$$\text{Energy density} = \frac{C_a \times \Delta V^2}{2 \times 3600} \times 1000 \quad (S2)$$

$$\text{Power density} = \frac{E \times 3600}{\Delta t} \quad (S3)$$

## Supporting Information

Where E and P represent the areal energy ( $Whcm^{-2}$ ) and power density ( $Wcm^{-2}$ ) of the electrode, V is the voltage window,  $C_a$  represents the areal capacitance, and  $\Delta t$  is the discharging time.

All the calculated electrochemical results from the CV/GCD curve are tabulated in the tables.

The amount of material deposited on the graphite sheet was calculated by measuring the weight of the graphite sheet film before and after the CNC and  $MnO_2$  deposition. The weight percentage of  $MnO_2$  ( $W_{MnO_2}\%$ ) was estimated using the following equation:

Mass loss:

$$W_{MACNC\%} = \frac{W_f - W_i}{W_f} \times 100\% \quad (S4)$$

Where  $W_i$  is the initial weight of the graphite sheet, and  $W_f$  is the final weight of the graphite sheet after CNCs/ $MnO_2$  deposition.

$$W_{CNCs/MnO_2} = w_f - w_i \quad (S5)$$

$$CNCs/MnO_2 = 0.002g$$

Hence, the deposition of on the surface of the graphite sheet is 2 mg.

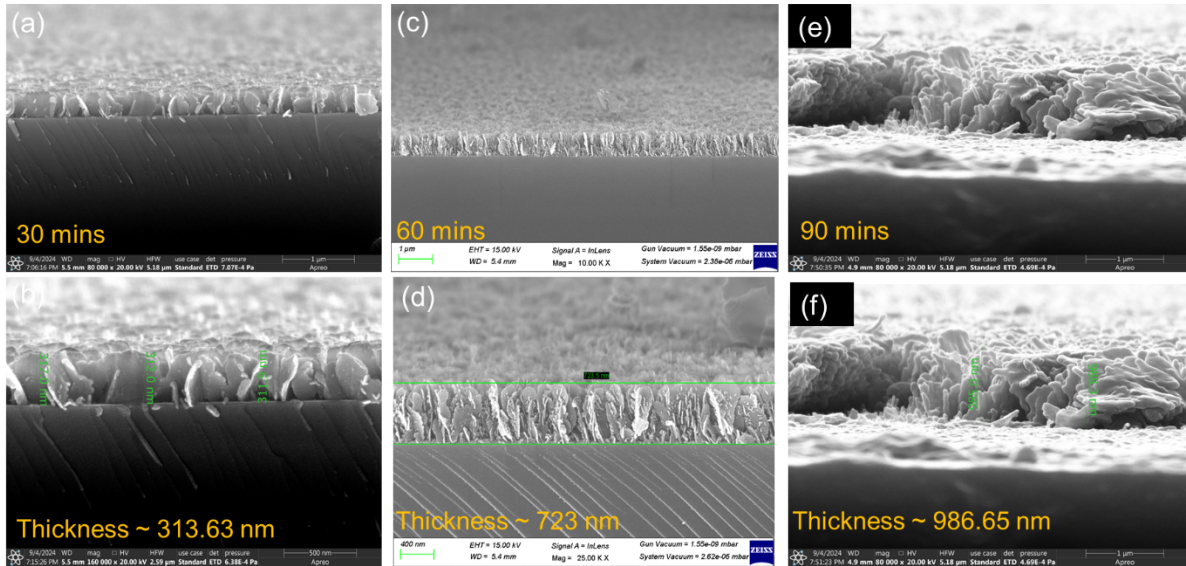

**Fig. S1** Cross-sectional view of  $MnO_2$  thin film (a-b) at 30 minutes (c-d) at 60 minutes, and (e-f) at 90 minutes.

## Supporting Information

**Table S2** shows the prepared electrode materials' Roughness, Skewness ( $R_{sk}$ ), and Kurtosis values ( $R_{ku}$ ).

| S.No | Name of the electrode           | Parameters                  | Values                       |
|------|---------------------------------|-----------------------------|------------------------------|
| 1.   | Graphite                        | Roughness                   | $R_{max}$ 243 nm, 37.7 nm    |
|      |                                 | Skewness ( $R_{sk}$ )       | -0.352                       |
|      |                                 | Kurtosis value ( $R_{ku}$ ) | 2.96                         |
| 2.   | CNCS/silicon                    | Roughness                   | $R_{max}$ 120 nm, 19.2 nm    |
|      |                                 | Skewness ( $R_{sk}$ )       | -0.175                       |
|      |                                 | Kurtosis value ( $R_{ku}$ ) | 2.58                         |
| 3.   | CNCS/Graphite                   | Roughness                   | $R_{max}$ 224 nm, Rq 34.1 nm |
|      |                                 | Skewness ( $R_{sk}$ )       | -0.304                       |
|      |                                 | Kurtosis value ( $R_{ku}$ ) | 2.78                         |
| 4.   | MnO <sub>2</sub> /CNCS/Graphite | Roughness                   | $R_{max}$ 427 nm, Rq 53.0 nm |
|      |                                 | Skewness ( $R_{sk}$ )       | 0.0955                       |
|      |                                 | Kurtosis value ( $R_{ku}$ ) | 3.44                         |

## Supporting Information

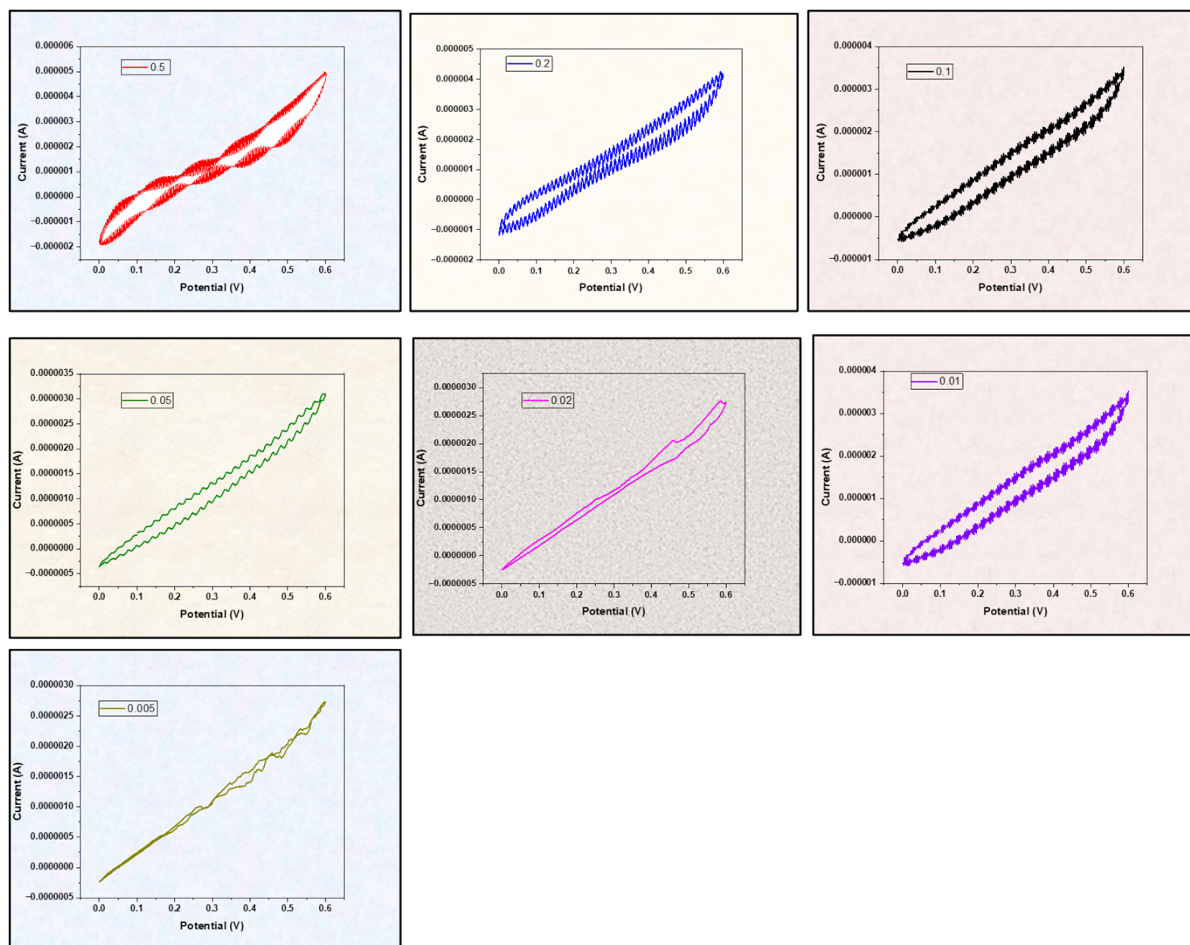

**Fig. S2** shows the CV of cellulose nanocrystals (CNCs) on the silicon substrate at different scan rates which ranges from 0.5 to 0.005 V/s.

**Table S3** Calculated areal capacitance at various scan rates with energy density and integrated area from the CV curve of the CNCs/Silicon electrode.

| Scan rate (V/s)<br>CNCs | Area       | Volatge window | Areal capacitance<br>(mF/cm <sup>2</sup> ) |
|-------------------------|------------|----------------|--------------------------------------------|
| 0.5                     | 4.26014E-7 | 0.6            | 0.00142                                    |
| 0.2                     | 3.46192E-7 | 0.6            | 0.00288                                    |
| 0.1                     | 2.83334E-7 | 0.6            | 0.00472                                    |
| 0.05                    | 1.63674E-7 | 0.6            | 0.00546                                    |
| 0.02                    | 8.47866E-8 | 0.6            | 0.00707                                    |

## Supporting Information

|       |            |     |         |
|-------|------------|-----|---------|
| 0.01  | 2.83334E-7 | 0.6 | 0.04722 |
| 0.005 | 2.67289E-8 | 0.6 | 0.00891 |

**Table S4** Calculated areal capacitance at various scan rates with energy density and integrated area from the CV curve of the CNCs/Graphite electrode.

| Scan rate<br>(CNCs/Graphite) | Area    | Voltage window | Areal capacitance<br>(mF/cm <sup>2</sup> ) |
|------------------------------|---------|----------------|--------------------------------------------|
| 0.5                          | 0.00239 | 0.8            | 7.46059                                    |
| 0.2                          | 0.00178 | 0.8            | 13.86841                                   |
| 0.1                          | 0.00142 | 0.8            | 22.22567                                   |
| 0.05                         | 0.0012  | 0.8            | 37.51883                                   |
| 0.02                         | 0.00103 | 0.8            | 80.108                                     |

## Supporting Information

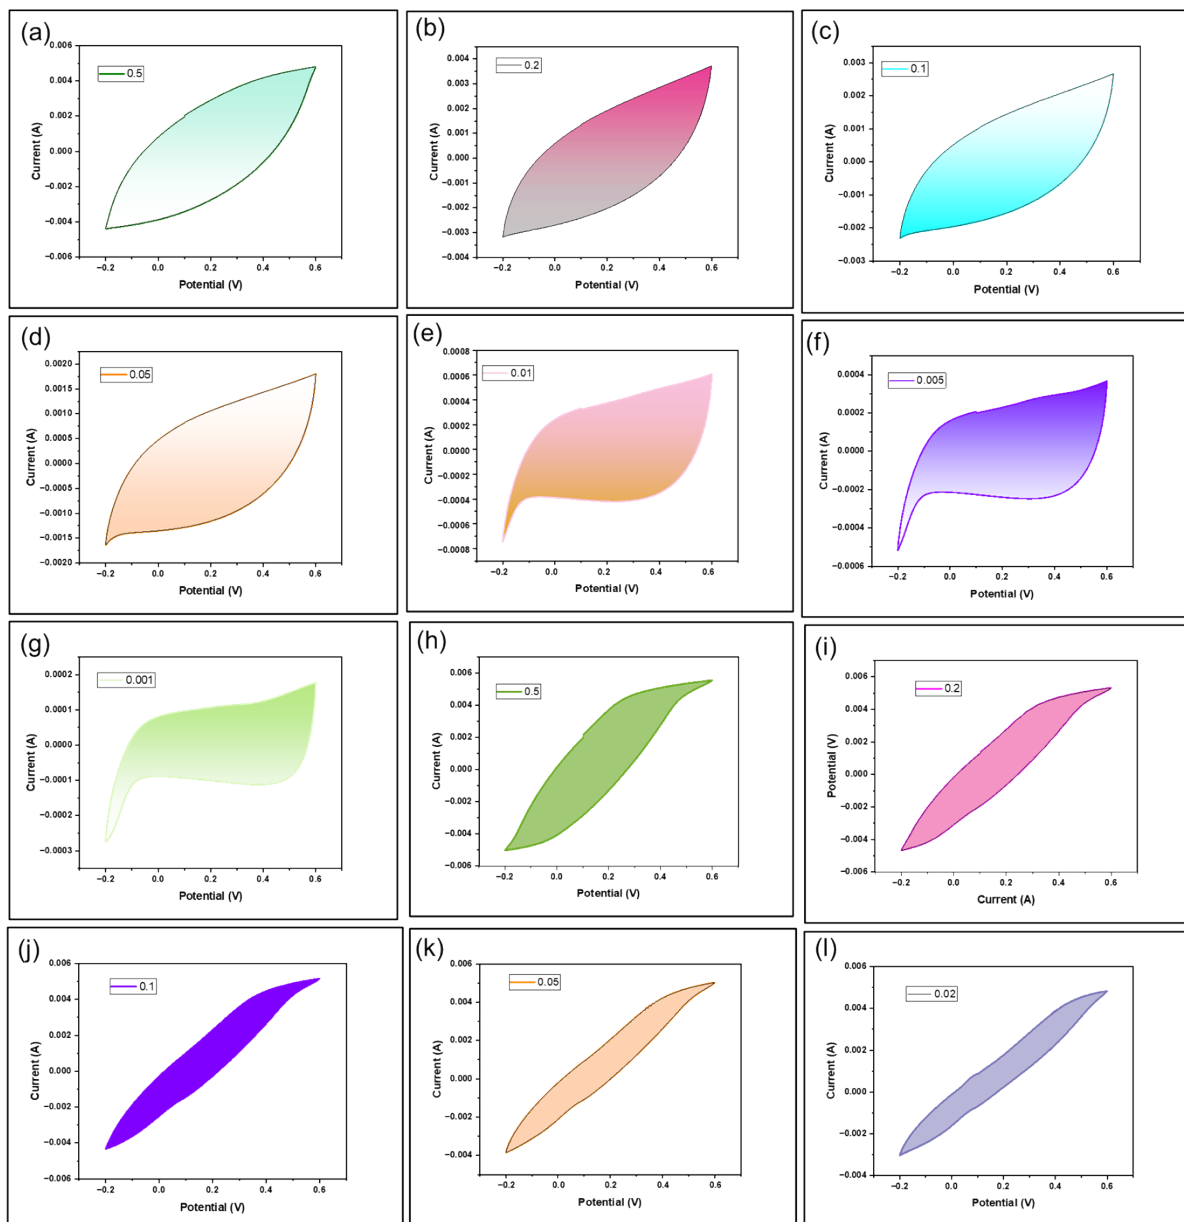

**Fig. S3** shows (a-g) the CV of pristine Graphite (h-l) CV of CNCs/Graphite at different scan rates spanning from 0.5 to 0.005 V/s.

**Table S5** Calculated areal capacitance at various scan rates with energy density and integrated area from the CV curve of the MnO<sub>2</sub> on CNCs/Graphite (20:20, 1h, 70W, 7.9mTorr, 75<sup>o</sup>C) electrode.

| Scan rate | Area | Voltage window<br>(-0.2 to +1 i.e.,<br>1.2V) | Areal capacitance<br>(mF/cm <sup>2</sup> ) |
|-----------|------|----------------------------------------------|--------------------------------------------|
|           |      |                                              |                                            |



## Supporting Information

|       |            |     |           |
|-------|------------|-----|-----------|
| 0.005 | 7.05455E-4 | 1.2 | 97.97988  |
| 0.5   | 0.00576    | 1.2 | 7.99858   |
| 0.2   | 0.00466    | 1.2 | 16.17431  |
| 0.1   | 0.00361    | 1.2 | 25.05605  |
| 0.05  | 0.00272    | 1.2 | 37.81669  |
| 0.02  | 0.00169    | 1.2 | 58.53999  |
| 0.01  | 0.0011     | 1.2 | 76.15694  |
| 0.005 | 7.05455E-4 | 1.2 | 97.97988  |
| 0.002 | 3.75121E-4 | 1.2 | 130.25027 |

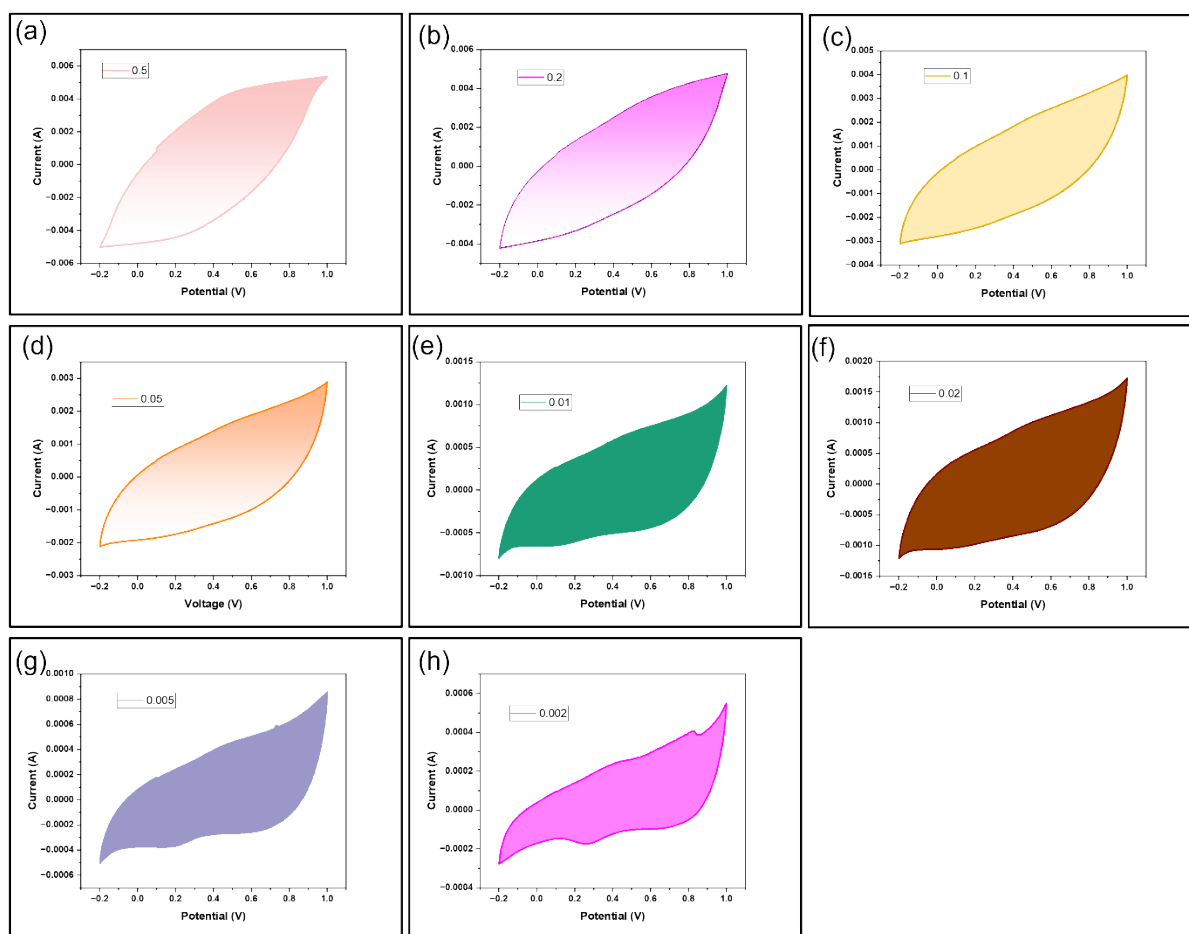

**Fig. S4** Cyclic voltammetry curves of  $\text{MnO}_2/\text{CNCs}/\text{Graphite-750C}$  at various scan rates.

## Supporting Information

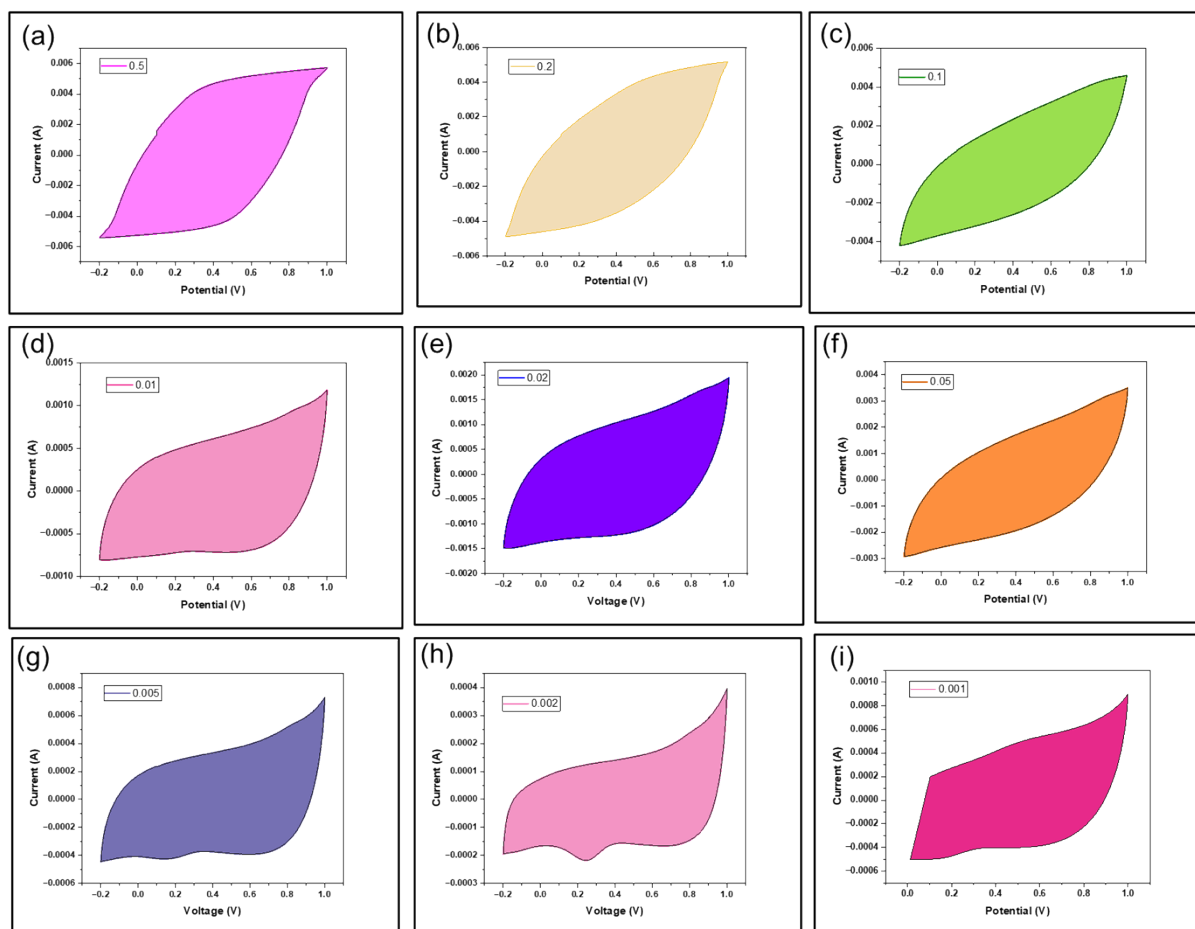

**Fig. S5** Cyclic voltammetry of  $\text{MnO}_2/\text{CNC}/\text{Graphite}$  @  $150^\circ\text{C}$  and @  $250^\circ\text{C}$  at various scan rates (0.5, 0.2, 0.1, 0.01, 0.02, 0.05, 0.005, 0.002, 0.001 V/s).

## Supporting Information

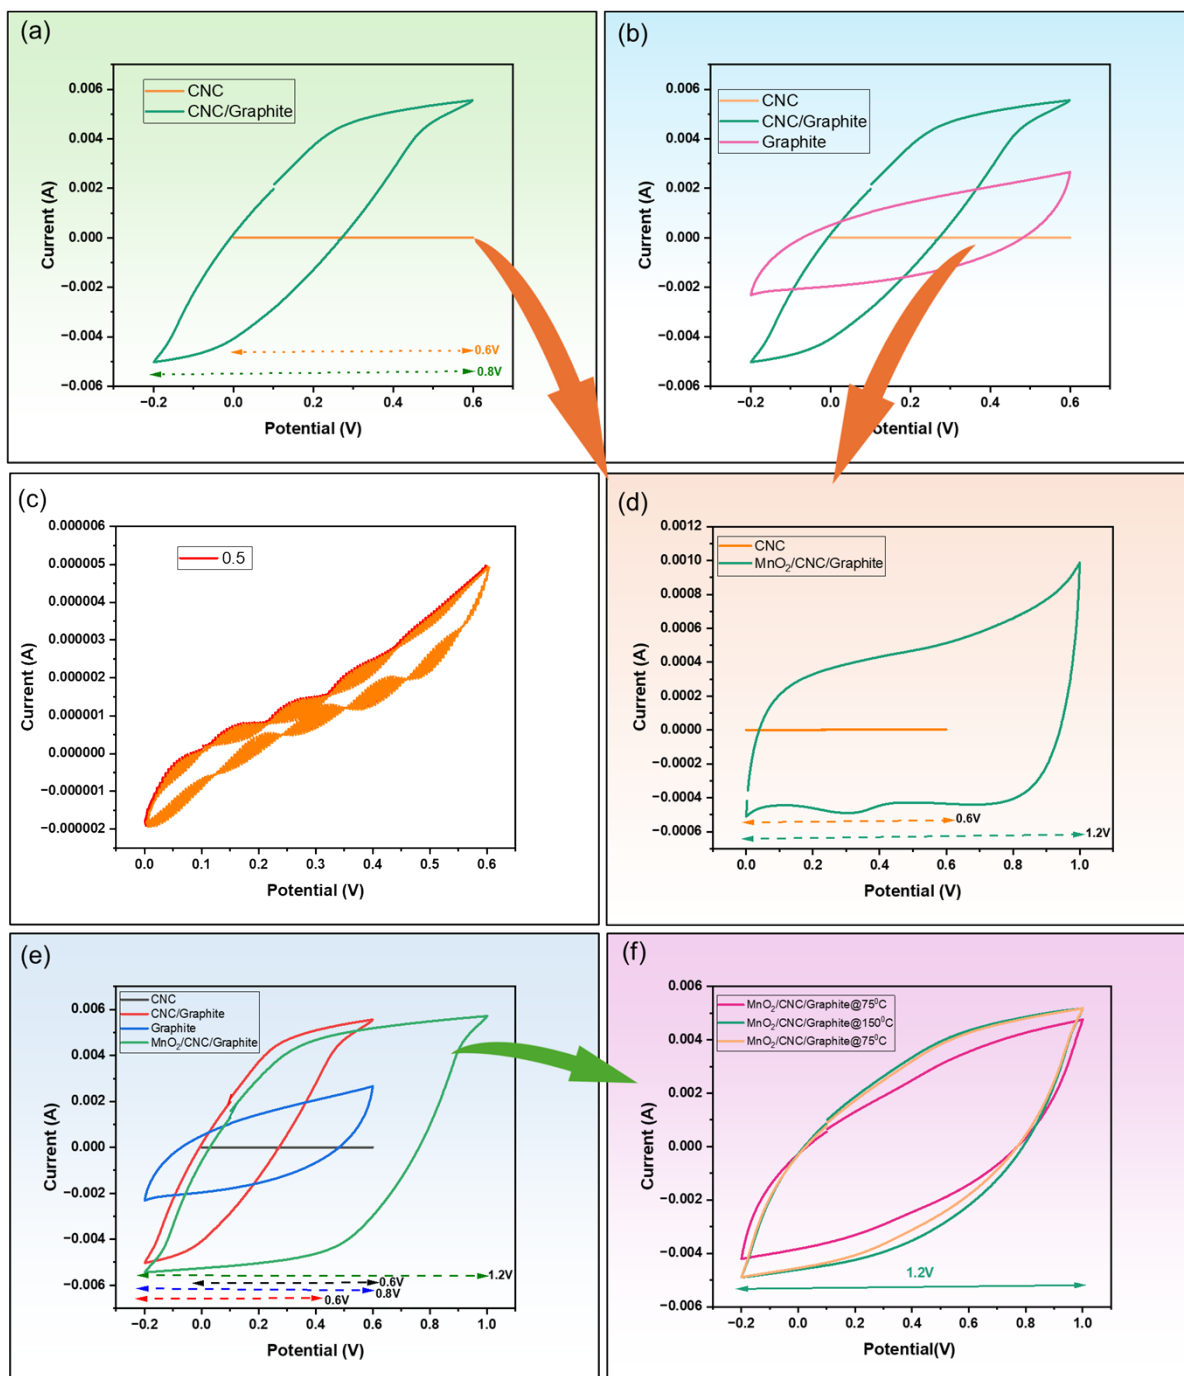

**Fig. S6** shows the comparative graph (a) the CV of CNCs, CNCs/Graphite, (b) the CV of CNCs, CNCs/Graphite, and Graphite, (c) shows CV of only CNCs, (d) CV curve of CNCs and composite, (e) Combine CV curve, and (f) the CV of MnO<sub>2</sub>/CNCs/Graphite at different temperatures.

## Supporting Information

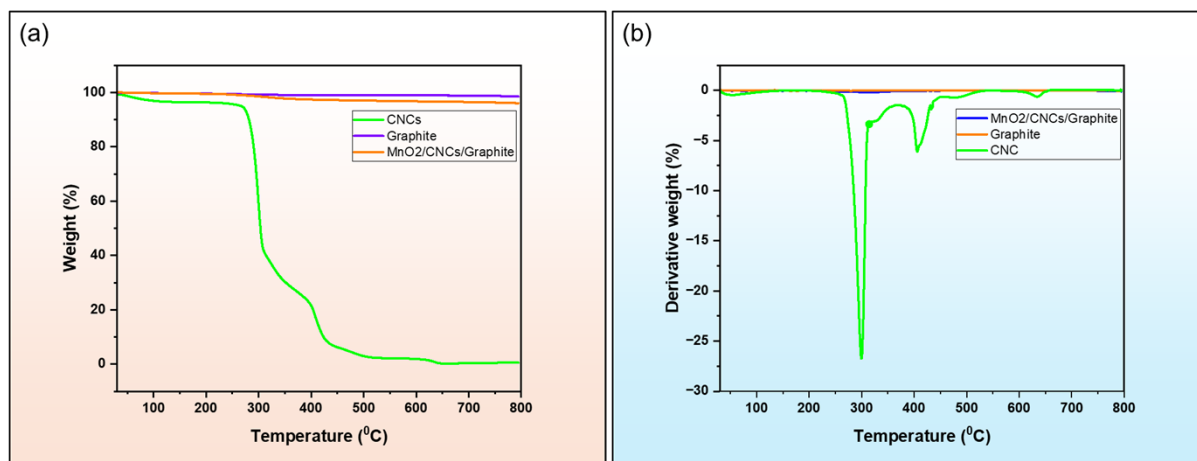

**Fig. S7** Thermal analysis of CNCs, Graphite, and MnO<sub>2</sub>/CNCs/Graphite (a) Thermogravimetry graph and, (b) Differential thermal analysis graph.

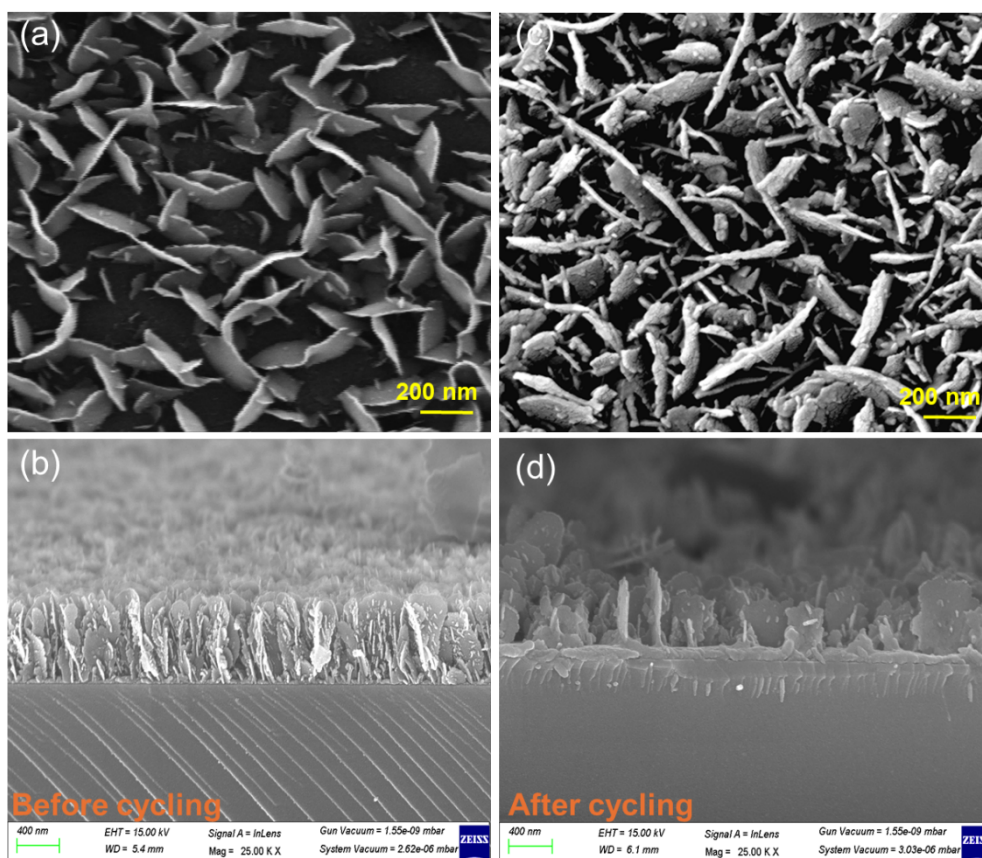

**Fig. S8** (a) Before cycling FESEM image, (b) Cross-section image before cycling, (c) After Cycling FESEM image, and (d) EDX image after cycling of symmetric supercapacitor device.

## Supporting Information

**Table S6** Comparison of electrode materials used, areal specific capacitance, energy density, power density, scan rate or current densities with cyclic efficiency after several cycles with the present study and other reported materials.

| Electrode materials used                                                                | Areal capacitance (mF/cm <sup>2</sup> ) | Energy density (mWh/cm <sup>2</sup> ) | Power density ( $\mu$ W/cm <sup>2</sup> ) | Current density or scan rate | Cyclic efficiency(%) | Cycles | Reference           |
|-----------------------------------------------------------------------------------------|-----------------------------------------|---------------------------------------|-------------------------------------------|------------------------------|----------------------|--------|---------------------|
| Graphene/CNT/BC                                                                         | 495                                     | 0.0328                                | 1200                                      | 35 mA/cm <sup>2</sup>        | 86                   | 5000   | 2                   |
| CNFs/Mxene/PC film (KOH)                                                                | 143                                     | -                                     | 17.5                                      | 0.1 mA/cm <sup>2</sup>       | 90                   | 10,000 | 3                   |
| Graphene-cellulose H <sub>2</sub> SO <sub>4</sub>                                       | 80                                      | 9                                     | -                                         | 80 mA/cm <sup>2</sup>        | -                    | -      | 4                   |
| Expanded graphite foil (EGF)                                                            | 65                                      | 0.163                                 | 1900                                      | 20 mA/cm <sup>2</sup>        | 95                   | 10,000 | 5                   |
| CNF/Mxene (H <sub>2</sub> SO <sub>4</sub> )                                             | 25.3                                    | 80                                    | 145                                       | 2 mV/s                       | -                    | -      | 6                   |
| Assymmetric (MnO <sub>2</sub> @CFCBSCA)                                                 | 130                                     | -                                     | -                                         | 2.3 mA/cm <sup>2</sup>       | 80.8                 | 10,000 | 7                   |
| MnO <sub>2</sub> /Cotton-derived carbon cloth                                           | 202                                     | 30.1 mu W h/cm <sup>2</sup>           | -                                         | 0.15 mW/cm <sup>2</sup>      | 87.7                 | 5000   | 8                   |
| polypyrrole (PPy)-coated cellulose paper                                                | 58                                      | -                                     | 600                                       | 2 mA cm <sup>2</sup>         | 91                   | 10,000 | 9                   |
| Wheat straw cellulosic biochar 1M KOH                                                   | 0.3                                     | -                                     | -                                         | 0.5 A/g                      | -                    | -      | 10                  |
| Cellulosic biomass/PAN membrane                                                         | 11.5                                    | -                                     | -                                         | 0.5 mA/cm <sup>2</sup>       | 92                   | 5000   | 11                  |
| CNF/CNT/RGO carbon aerogels                                                             | 109.4                                   | -                                     | -                                         | -                            | 83.8                 | 100    | 2                   |
| Mno <sub>2</sub> /CNCs/Graphite 1M Na <sub>2</sub> SO <sub>4</sub> 1.2V, Voltage window | 148.9                                   | 20.69                                 | 2677                                      | 2 mV/s                       | 85.27                | 15,000 | <b>Present work</b> |

## Supporting Information

### References

- 1 Q. Zhang, X. Wang, Z. Pan, J. Sun, J. Zhao, J. Zhang, C. Zhang, L. Tang, J. Luo, B. Song, Z. Zhang, W. Lu, Q. Li, Y. Zhang and Y. Yao, *Nano Lett*, 2017, 17, 2719–2726.
- 2 Y. Bai, R. Liu, E. Li, X. Li, Y. Liu and G. Yuan, *J Alloys Compd*, 2019, 777, 524–530.
- 3 W. Chen, D. Zhang, K. Yang, M. Luo, P. Yang and X. Zhou, *Chemical Engineering Journal*, 2021, 413, 127524.
- 4 M. Sevilla, G. A. Ferrero and A. B. Fuertes, *Energy Storage Mater*, 2016, 5, 33–42.
- 5 H. Y. Li, Y. Yu, L. Liu, L. Liu and Y. Wu, *Electrochim Acta*, 2017, 228, 553–561.
- 6 Z. Liu, T. Lu and Q. Chen, *Carbon N Y*, 2021, 171, 514–523.
- 7 C. Wan, Y. Jiao, D. Liang, Y. Wu and J. Li, *Electrochim Acta*, 2018, 285, 262–271.
- 8 C. Zhou, X. Wu, C. Luo, Z. Liu, L. Wang, C. Yang and H. Yu, *Sustainable Materials and Technologies*, 2024, 40, e00891.
- 9 Z. Xiong, Z. Fang, Z. Ding, G. Li, J. Zhou, K. Chen, D. Yang and X. Qiu, *Macromol Mater Eng*, 2022, 307, 2200359.
- 10 U. Jamil, M. Zeeshan, S. R. Khan and S. Saeed, *Journal of Water Process Engineering*, 2023, 53, 103892.
- 11 S. Wang, Y. Yu, S. Luo, X. Cheng, G. Feng, Y. Zhang, Z. Wu, G. Compagnini, J. Pooran and A. Hu, *Appl Phys Lett*, 2019, 115, 083904.
